# Supplementary material for: Genomic inversions and GOLGA core duplicons underlie disease instability at the 15q25 locus
Source: PLoS Genet. 2019 Mar 27;15(3):e1008075. doi: 10.1371/journal.pgen.1008075 (PMC6436712; doi:10.1371/journal.pgen.1008075)
Supplement: S1 Table — (XLSX) [file pgen.1008075.s007.xlsx]

## Sheet: S1 Table 
S1 Table. BLAT results of GOLGA2P10 and GOLGA6L5P in human and nonhuman primate reference genomes
Duplication Blocks	Coordinates	GOLGA repeats	orientation
Human (GRCh38/hg38) Block A: chr15:82190663-82534139	chr15:82336721-82336855	E7_GOLGA2P10	-
	chr15:82338887-82349437	E10-E1_GOLGA6L5P	-
	chr15:82355041-82355374	E1_GOLGA2P10	+
	chr15:82430018-82440096	E1-E10_GOLGA6L5P	+
	chr15:82442236-82442373	E7_GOLGA2P10	+
	chr15:82471477-82513982	E1-E8_GOLGA2P10	-
	chr15:82519590-82530209	E1-E10_GOLGA6L5P	+
	chr15:82532673-82533829	E7-E8_GOLGA2P10	+
Human (GRCh38/hg38) Block B: chr15:84045983-84596420	chr15:84165408-84167397	E10_GOLGA6L5P	+
	chr15:84169557-84169694	E7_GOLGA2P10	+
	chr15:84198846-84230185	E1-E8_GOLGA2P10	-
	chr15:84235773-84246320	E1-E10_GOLGA6L5P	+
	chr15:84344423-84344756	E1_GOLGA2P10	-
	chr15:84350344-84360384	E1-E10_GOLGA6L5P	+
	chr15:84389732-84393690	E2-E9_GOLGA6L5P	+
	chr15:84394465-84400347	E2-E8_GOLGA2P10	+
	chr15:84425121-84425258	E7_GOLGA2P10	-
	chr15:84427398-84437807	E1-E10_GOLGA6L5P	-
	chr15:84443397-84474712	E1-E8_GOLGA2P10	+
	chr15:84503871-84504008	E7_GOLGA2P10	-
	chr15:84506168-84516847	E1_E10_GOLGA6L5P	-
Human (GRCh38/hg38) Block C: chr15:85169772-85286411	chr15:85203444-85234812	E1-E8_GOLGA2P10	-
	chr15:85240410-85250934	E1-E10_GOLGA6L5P	+
	chr15:85253127-85253261	E7_GOLGA2P10	+
Chimpanzee (Clint_PTRv2/panTro6) BlockA: chr15:61026872-61093133	chr15:61033608-61033745	E7_GOLGA2P10	-
	chr15:61035896-61046208	E1-E10_GOLGA6L5P	-
	chr15:61075841-61077831	E10_GOLGA6L5P	-
Chimpanzee (Clint_PTRv2/panTro6) BlockB: chr15:62682061-62970290	chr15:62699408-62700565	E7-E8_GOLGA2P10	-
	chr15:62702753-62706356	E10_GOLGA6L5P	-
	chr15:62709478-62714153	E1-E6_GOLGA6L5P	-
	chr15:62719759-62720092	E1_GOLGA2P10	+
	chr15:62929162-62929299	E7_GOLGA2P10	-
	chr15:62931479-62941503	E1-E10_GOLGA6L5P	-
Chimpanzee (Clint_PTRv2/panTro6) BlockC: chr15:63800604-63814519	chr15:63808179-63811873	E10_GOLGA6L5P	+
	chr15:63814052-63814186	E7_GOLGA2P10	+
Gorilla (gorGor4.1/gorGor4) BlockA: chr15:61183946-61473437	chr15:61199994-61200128	E7_GOLGA2P10	-
	chr15:61202312-61218257	E1-E10_GOLGA6L5P	-
	chr15:61419590-61419924	E1_GOLGA2P10	-
	chr15:61432584-61433403	E10_GOLGA6L5P	+
	chr15:61438370-61439513	E7-E8_GOLGA2P10	+
Gorilla (gorGor4.1/gorGor4) BlockB: chr15:62717130-63175738	chr15:62724508-62732012	E1-E6+E10_GOLG6	+
	chr15:63094316-63094822	E10_GOLGA6L5P	+
	chr15:63126979-63127202	E8_GOLGA2P10	-
	chr15:63166157-63167322	E10+E6+E9_GOLGA6L5P	-
Gorilla (gorGor4.1/gorGor4) BlockC: chr15:63836004-63917917	chr15:63837390-63843863	E2-E8_GOLGA2P10	-
	chr15:63915080-63915237	E8_GOLGA2P10	+
Orangutan (Susie_PABv2/ponAbe3) BlockA: chr15:62906278-63212136	chr15:62914789-62914924	E7_GOLGA2P10	-
	chr15:62917102-62927280	E1-E10_GOLGA6L5P	-
	chr15:62932890-62933224	E1_GOLGA2P10	+
	chr15:63005775-63015799	E1-E10_GOLGA6L5P	+
	chr15:63042730-63048929	E2-E8_GOLGA2P10	-
	chr15:63075719-63085882	E1-E10_GOLGA6L5P	+
	chr15:63087912-63088050	E7_GOLGA2P10	+
	chr15:63112747-63123694	E2-E8_GOLGA2P10; E2-E9_GOLGA6L5P	-
	chr15:63154840-63156868	E10_GOLGA6L5P	-
Orangutan (Susie_PABv2/ponAbe3) BlockB chr15:64772843-64789016	chr15:64773662-64774814	E7-E8_GOLGA2P10	-
	chr15:64776925-64787344	E1-E10_GOLGA6L5P	-
Orangutan (Susie_PABv2/ponAbe3) BlockC: chr15:65481246-65596149	chr15:65483479-65581507	E1-E8_GOLGA2P10; E1-E9_GOLGA6L5P	-
	chr15:65593696-65594192	E2-E3_GOLGA2P10	+
Macaque (BCM Mmul_8.0.1/rheMac8) BlockA: chr7:59988499-60901705	chr7:60009318-60010961	E7-E8_GOLGA2P10	-
	chr7:60013065-60017145	E10_GOLGA6L5P	-
	chr7:60020149-60020954	E6+E8_GOLGA6L5P	-
	chr7:60039277-60039643	E8_GOLGA2P10	-
	chr7:60387395-60403147	E1+E6+E8+E9+E10_GOLGA6L5P	+
	chr7:60405271-60405412	E7_GOLGA2P10	+
	chr7:60490926-60491280	E8_GOLGA2P10	+
	chr7:60860298-60871020	E1-E10_GOLGA6L5P; E2+E3+E6_GOLGA2P10	+
	chr7:60873130-60874305	E7-E8_GOLGA2P10	+
Macaque (BCM Mmul_8.0.1/rheMac8) BlockB: chr7:59988499-60901705	chr7:62542541-62542851	E1_GOLGA2P10	+
	chr7:62604929-62606953	E8_GOLGA2P10	-
	chr7:62609085-62610683	E7_GOLGA2P10	-
	chr7:62612832-62622343	E1-E10_GOLGA6L5P; E2-E3_GOLGA2P10	-
